# Supplementary material
Source: PubMed Central journal article supplement (PMC6901020)
Supplement: NIHMS1058379-supplement-1.pdf [file NIHMS1058379-supplement-1.pdf]

**Supplementary Table 1:****Biomarker Eligibility for AZD4547 FGFR Inhibitor Sub-study D**

| Gene  | Alteration type | Eligible alteration                                                                                                                                                                                      |
|-------|-----------------|----------------------------------------------------------------------------------------------------------------------------------------------------------------------------------------------------------|
| FGFR1 | Substitution    | T141R, R445W, N546K, K656E, G818R                                                                                                                                                                        |
|       | Fusion*         | FGFR1-TACC1                                                                                                                                                                                              |
|       | Amplification   | FM standard thresholds: $\geq 6$ estimated copies (or $\geq 7$ in triploid, $\geq 8$ in tetraploid+ samples)                                                                                             |
| FGFR2 | Substitution    | A97T, W156*, N211I, S252L, S252W, P253R, D283N, W290C, A315T, S320C, D336N, Y375C, C382R, V395D, E470Q, D471N, H544Q, I547V, N549D, N549K, N549S, N549Y, G613V, K659E, K659N, R678G, P708S, E777K, T786K |
|       | Fusion          | FGFR2-TACC2, FGFR2-BICC1, FGFR2-PPAPDC1A, FGFR2-SLC45A3, FGFR2-AFF3, FGFR2-CASP7, FGFR2-CCDC6, FGFR2-AHCYL1, FGFR2-KIAA1967, FGFR2-OFD1                                                                  |
|       | Amplification   | FM standard thresholds: $\geq 6$ estimated copies (or $\geq 7$ in triploid, $\geq 8$ in tetraploid+ samples)                                                                                             |
| FGFR3 | Substitution    | S131L, R248C, S249C, G370C, Y373C, R399C, S433C, D641N, K650E, K650M, V677I, K715M                                                                                                                       |
|       | Fusion          | FGFR3-TACC3, FGFR3-WHSC1, FGFR3-LETM1, FGFR3-BAIAP2L1                                                                                                                                                    |
|       | Amplification   | FM standard thresholds: $\geq 6$ estimated copies (or $\geq 7$ in triploid, $\geq 8$ in tetraploid+ samples)                                                                                             |

\*Note: FGFR gene introns are not targeted on current version of FM platform (T5) and therefore FGFR gene fusions are only detected when breakpoints occur in proximity to FGFR exons (reduced sensitivity)
